# Supplementary material for: Association of GSTTI, M1 and Polymorphism in GSTPI with Chronic Periodontal Disease in a Pakistani Population
Source: MDPI journal article supplement (doi:10.3390/genes14020455), 2023-02-10
Supplement: s1 [file s1]

**Supplementary Table S1.** Genotype and allele frequencies, heterozygosity value, and  $\chi^2$  value at single nucleotide polymorphism rs1695 in GSTP1 gene among case and controls enrolled during present study. P value represents the output of Hardy-Weinberg equation calculated for cases and controls.

| Parameters<br>Nucleotide | Genotypic frequency |             |             | Allelic frequency |              | X <sup>2</sup> value | P-Value          |
|--------------------------|---------------------|-------------|-------------|-------------------|--------------|----------------------|------------------|
|                          | AA                  | AG          | GG          | A                 | G            |                      |                  |
| Controls<br>(HO)         | 177<br>(88%)        | 20<br>(10%) | 4<br>(2%)   | 374<br>(93%)      | 28<br>(7%)   |                      |                  |
| HE                       | 173.9751            | 26.0498     | 0.9751      | 0.9303            | 0.0697       | <b>10.8409</b>       | <b>&lt; 0.01</b> |
| Case (HO)                | 115<br>(57%)        | 59<br>(29%) | 29<br>(14%) | 289<br>(71%)      | 117<br>(29%) |                      |                  |
| HE                       | 101.7363            | 82.5274     | 16.7363     | 71.14             | 28.84        | <b>17.7542</b>       | <b>&lt;0.01</b>  |

P < 0.01 = Significant. HO = Observed heterozygosity and HE = Expected heterozygosity.
